# Supplementary material for: The Formation of Neochromosomes during Experimental Evolution in the Yeast Saccharomyces cerevisiae
Source: MDPI journal article supplement (doi:10.3390/genes12111678), 2021-10-23
Supplement: s1 [file s1]

**Suppl. Table S1: Sequence, orientation and position of primers used in this work.**

| Primer | Sequence (5' – 3')       | Chrom. | Strand | Coord. 5' end |
|--------|--------------------------|--------|--------|---------------|
| AT 354 | GTCCAGATGATACACCTTGT     | IV     | minus  | 438,050       |
| AT 360 | GATGGAACCTGAAAAGAACAC    | IV     | plus   | 645,011       |
| AT 361 | GCATAATGCATATTTTGATGATGC | IV     | minus  | 521,318       |
| AT390  | GAGTCATGGAATTCAGTAC      | XV     | plus   | 117,371       |

**Figure S1:** Copy number variations along chromosomes in late progenies of evolved mutants.

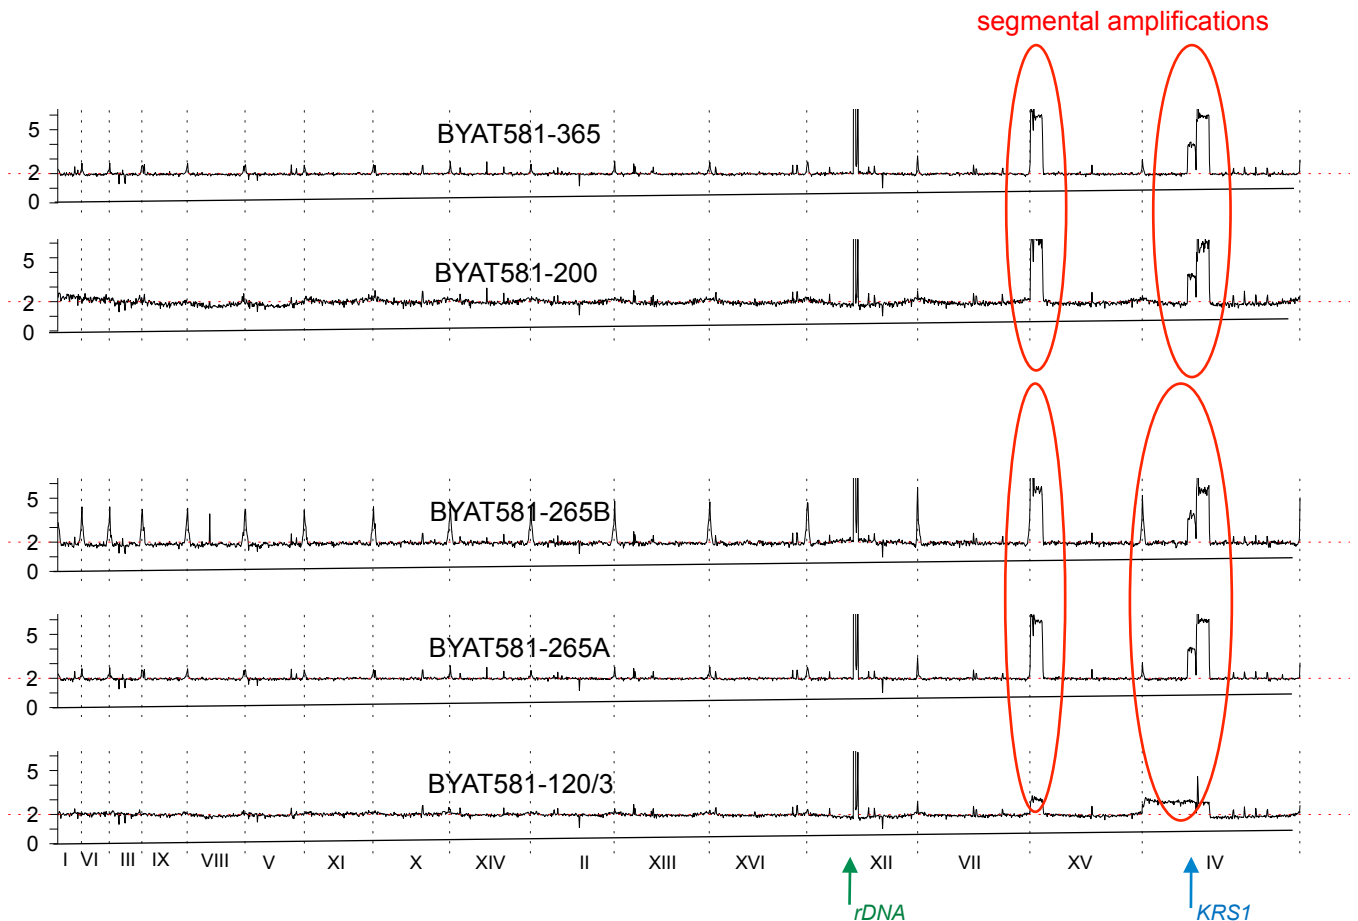

Same legend as [Figure 2a](#). Strains BYAT581-265A and BYAT581-265B are subclones of BYAT581-120/3 after 145 generations in YPD medium. Strain BYAT581-345 is a subclone of BYAT581-200 after 145 generations in YPD medium.. Data for BYAT581-120/3 and BYAT581-200 are taken from [Figure 2a](#).

**Suppl. Figure S2:** Images of Illumina deep sequencing coverages of evolved mutants mapped to the reference S288C genome sequence.

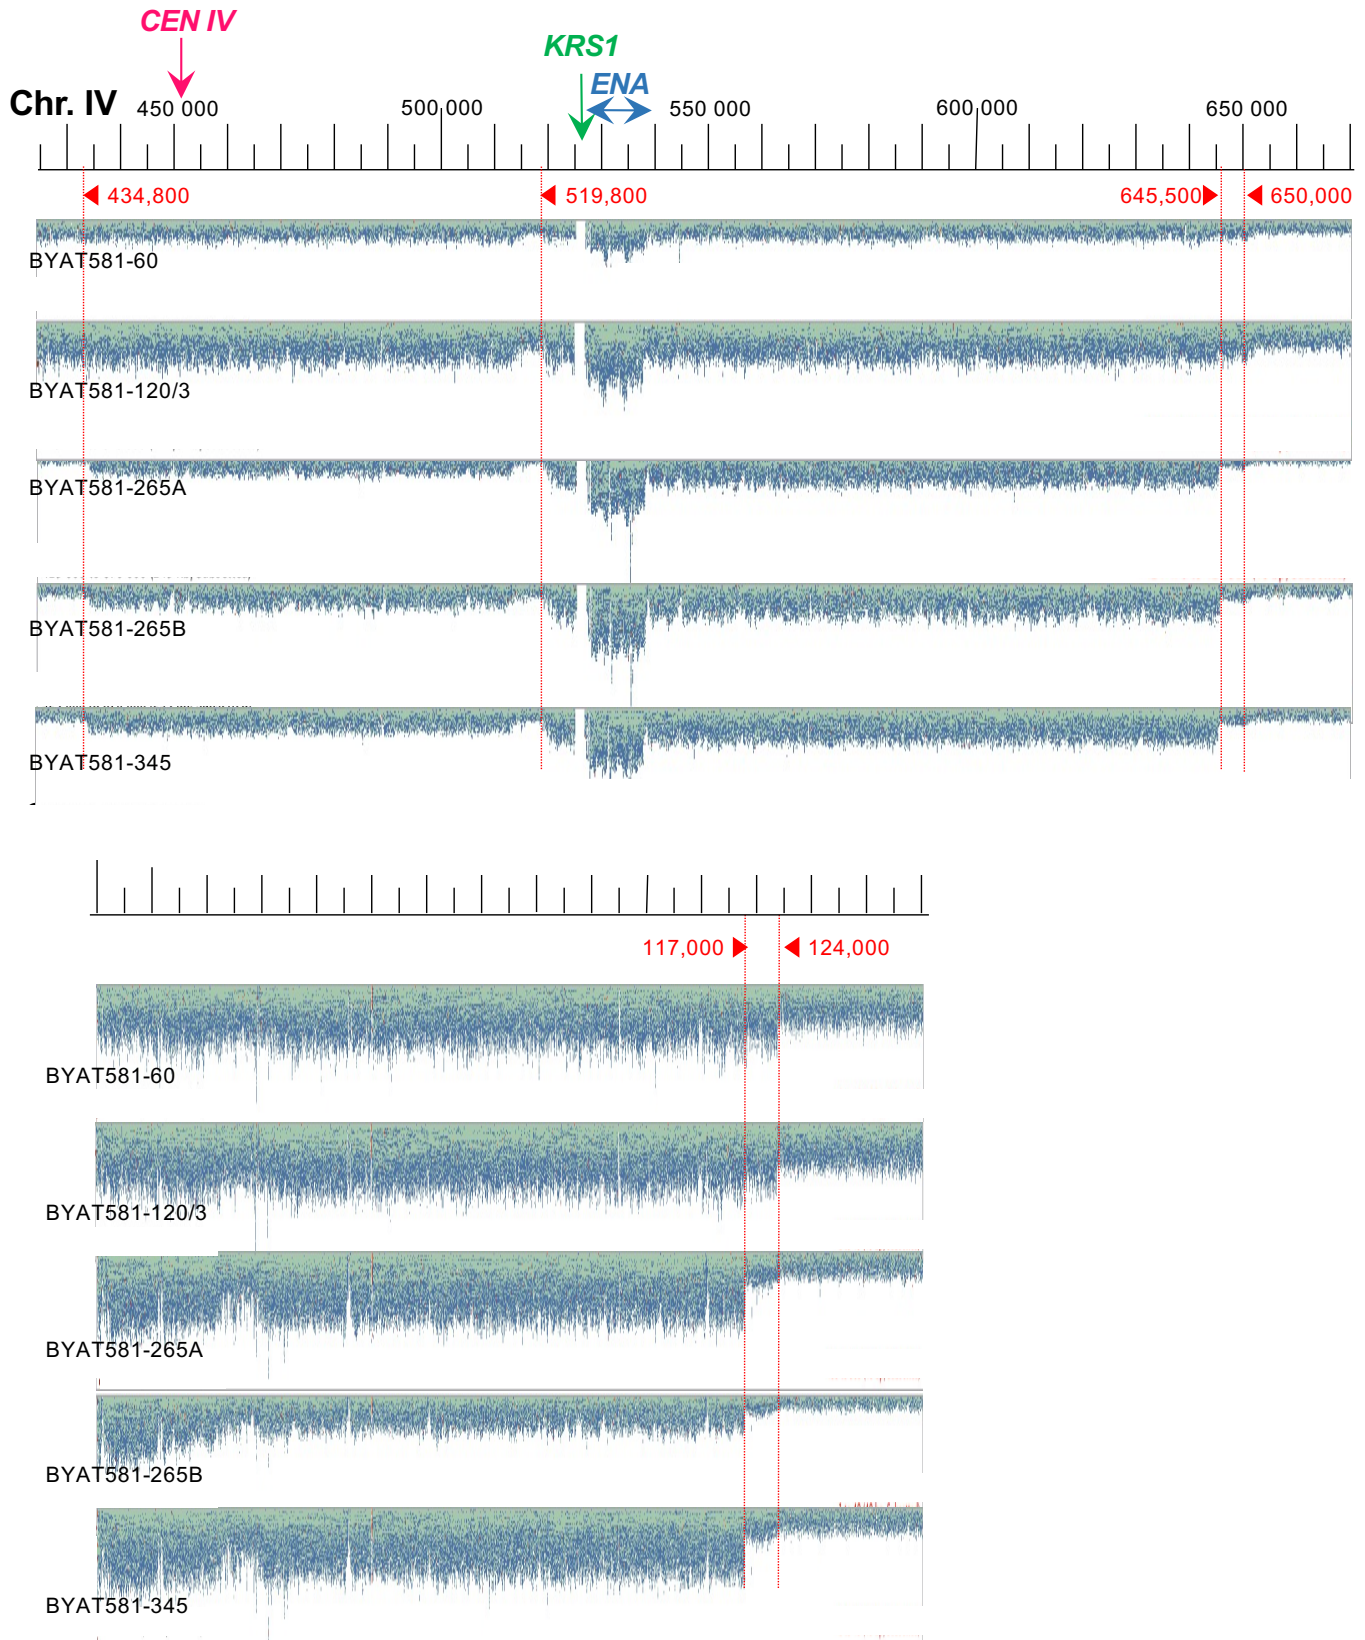

The *Tablet* [1] images of sequence coverages are shown for regions of chromosomes IV and XV corresponding to amplicons IV-C, IV-A and XV-A. Evolved mutants bearing amplicons IV-D and XV-A were sequenced at average depths of 392 X and 305 X, respectively, for BYAT581-60 and BYAT581-120/3. Evolved mutants bearing amplicons IV-C, IV-A and XV-A were sequenced at average depths of 269 X, 170 X and 290 X, respectively, for BYAT265A, BYAT582-265B and BYAT581-345. Vertical red lines locate deduced amplicon ends on the chromosome maps.

[1] Milne, I.; Bayer, M.; Stephen, G.; Cardle, L.; Marshall, D. *Tablet: Visualizing Next-Generation Sequence Assemblies and Mappings*. *Methods Mol Biol.* **2016** 1374:253-268. doi: 10.1007/978-1-4939-3167-5\_14.
